# Supplementary material for: The requirement of Mettl3-promoted MyoD mRNA maintenance in proliferative myoblasts for skeletal muscle differentiation
Source: PubMed Central journal article supplement (PMC5627051; doi:10.1098/rsob.170119), 2017-09-06
Supplement: rsob170119supp1.pdf [file rsob170119supp1.pdf]

## **Supplementary material**

### **The requirement of Mettl3-promoted *MyoD* mRNA maintenance in proliferative myoblasts for skeletal muscle differentiation**

Kensuke Kudou<sup>1,2</sup>, Tetsuro Komatsu<sup>1</sup>, Jumpei Nogami<sup>1</sup>, Kazumitsu Maehara<sup>1</sup>, Akihito Harada<sup>1</sup>, Hiroshi Saeki<sup>2</sup>, Eiji Oki<sup>2</sup>, Yoshihiko Maehara<sup>2</sup>, and Yasuyuki Ohkawa<sup>1</sup>

<sup>1</sup>Division of Transcriptomics, Medical Institute of Bioregulation, Kyushu University, JST-CREST, Fukuoka 812-8582, Japan

<sup>2</sup>Department of Surgery and Science, Graduate School of Medical Sciences, Kyushu University, Fukuoka 812-8582, Japan

Corresponding author: Yasuyuki Ohkawa (yohkawa@bioreg.kyushu-u.ac.jp)

Figure S1

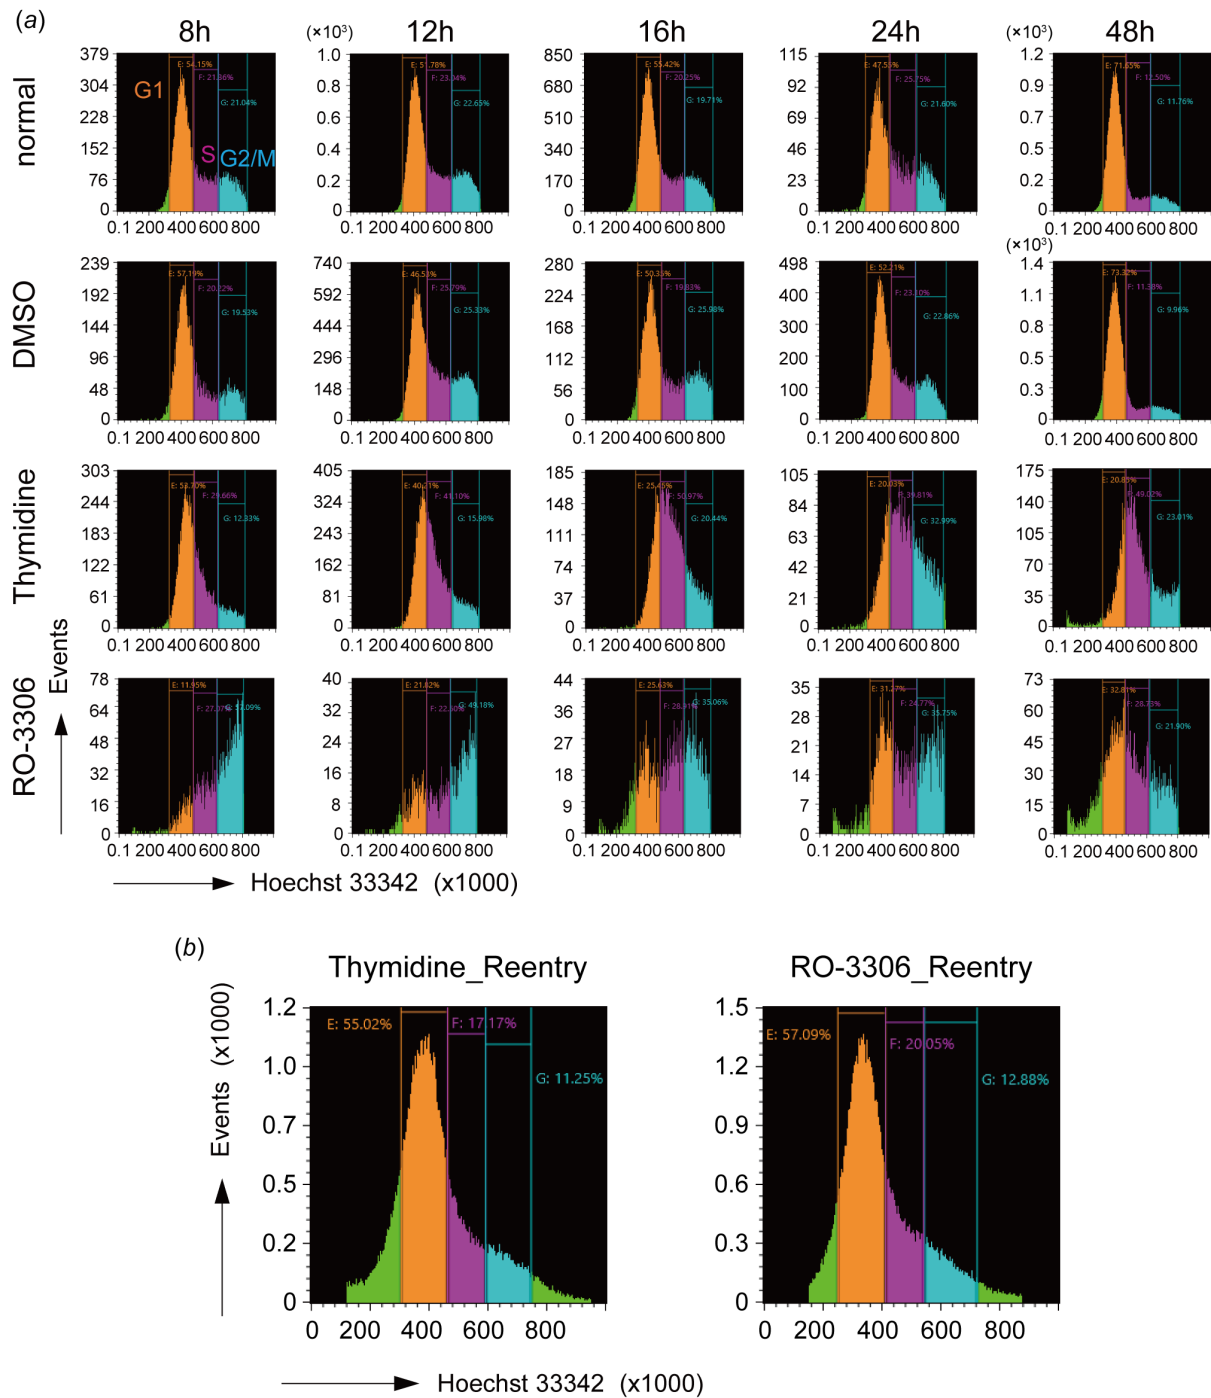

**Figure S1.** Cell treatments with thymidine and RO-3306. (a) Population changes of C2C12 cells in each cell cycle phase after incubation with thymidine, RO-3306, or DMSO. (b) Population of C2C12 cells treated with thymidine or RO-3306 in each cell cycle 24 h after re-entry into the cell cycle.

Figure S2

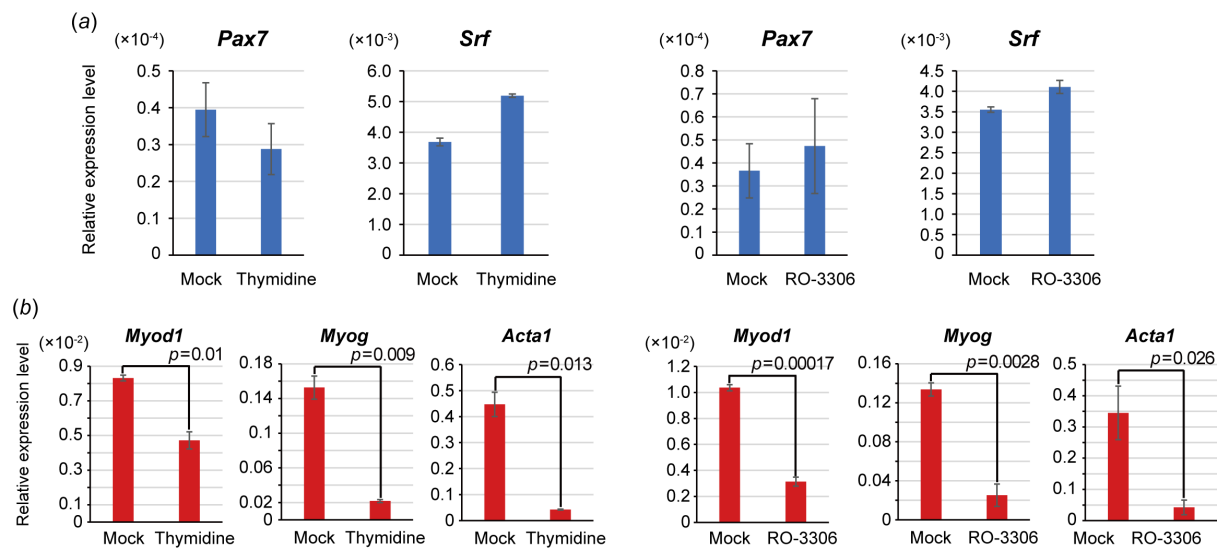

**Figure S2.** mRNA levels of skeletal muscle-specific factors upon cell cycle arrest. (a) qRT-PCR analysis of *Pax7* and *Srf* in undifferentiated C2C12 cells treated with thymidine (left panels) and RO-3306 (right panels) for 48 h. Data represent the mean  $\pm$  SD (n=3). (b) qRT-PCR analysis of *Myod1*, *Myog*, and *Acta1* in C2C12 cells treated with thymidine (left panels) or RO-3306 (right panels) at 48 h after the induction of differentiation.

Figure S3

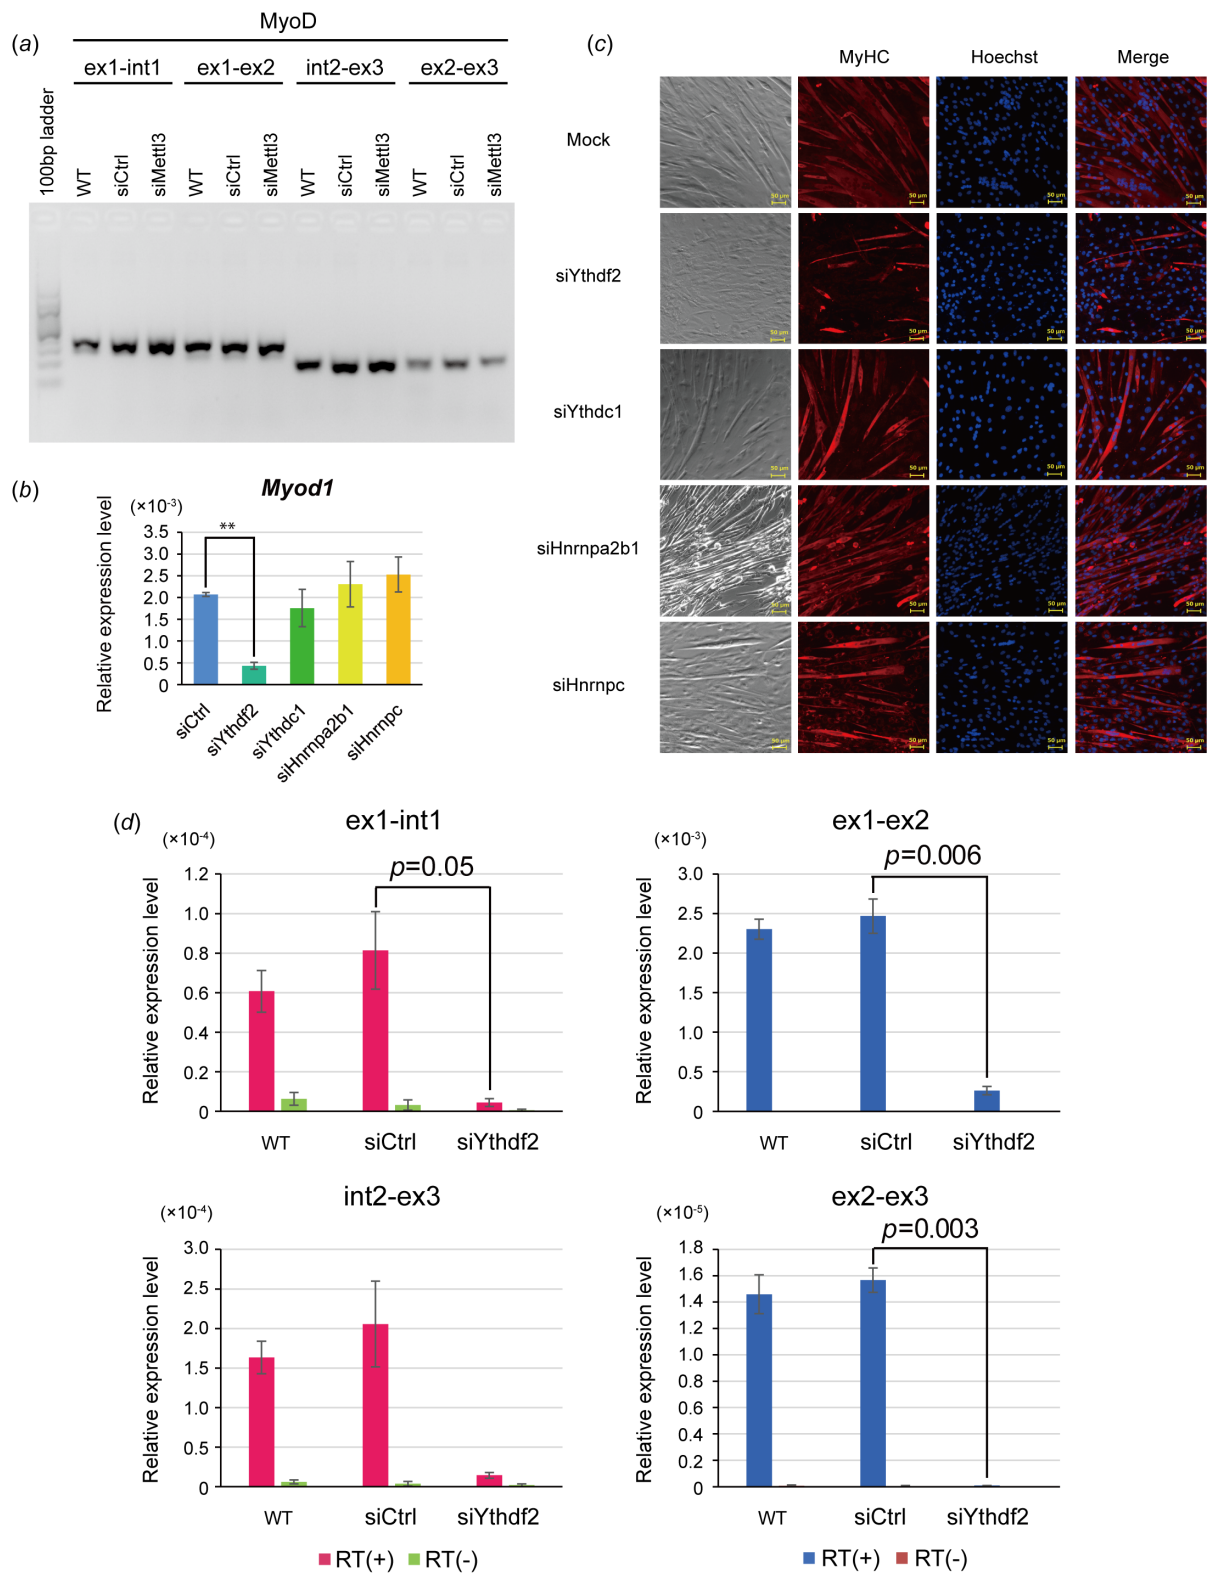

**Figure S3.** Knockdown of Ythdf2 leads to a decrease of both processed and unprocessed *MyoD* RNA. (a) Agarose gel electrophoresis of PCR products obtained using the four *MyoD* primer sets described in figure 3a. ex: exon, int: intron. (b) qRT-PCR analysis of *Myod1* in undifferentiated C2C12 cells after knockdown of Ythdf2, Ythdc1, Hnrnpa2b1, or Hnrnpc. Data are presented as the mean  $\pm$  SD (n=3). (c) Morphology of C2C12 cells after knockdown of Ythdf2, Ythdc1, Hnrnpa2b1, or Hnrnpc. Cells were immunostained for anti-MyHC and Hoechst at 72 h after the induction of differentiation. (d) qRT-PCR analysis of *Myod1* in Ythdf2 knockdown C2C12 cells using the four primers described in figure 3a. To confirm the absence of DNA contamination, each sample was also analysed by qRT-PCR without reverse transcriptase. RT: reverse transcriptase. Error bars show  $\pm$  SD (n=3). *P*-value versus control siRNA.

Figure S4

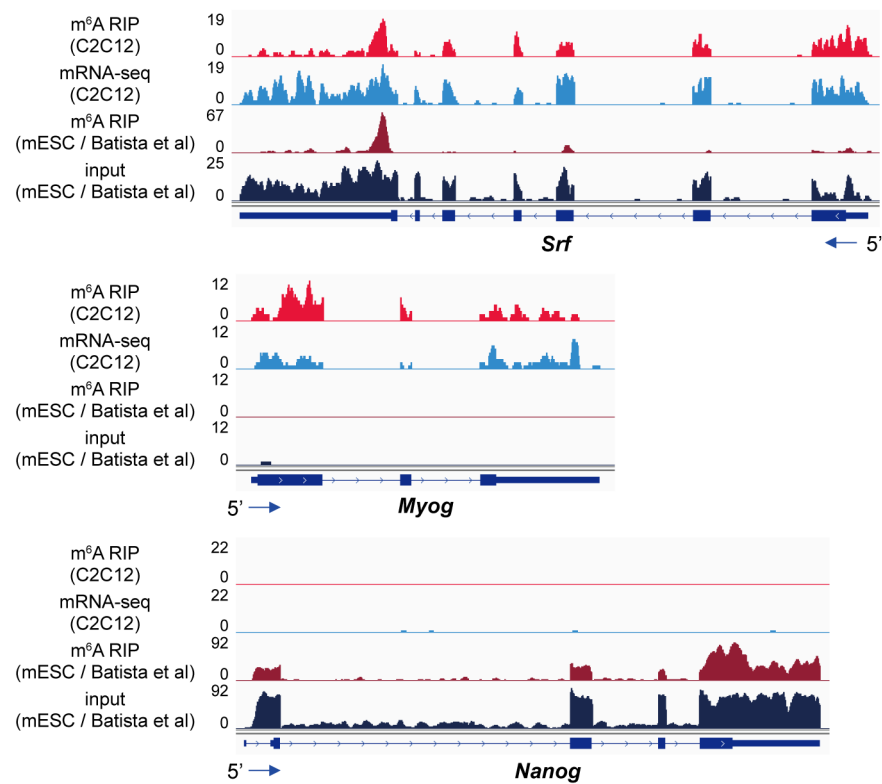

**Figure S4.** m<sup>6</sup>A-seq analysis using C2C12 and mouse embryonic stem cells. Integrative Genomics Viewer tracks displaying reads coverage of *Myog*, *Srf*, and *Nanog* in m<sup>6</sup>A-seq of total RNA and mRNA-seq data of C2C12 cells and mouse embryonic stem cells (mESC) (SRR1207291 (input), SRR1207292 (m<sup>6</sup>A RIP), Batista et al. 2014).

| List of primers for qRT-PCR |                                      |
|-----------------------------|--------------------------------------|
| Myod1_F                     | CAACCCACAGAACCTTTGTCATTG             |
| Myod1_R                     | GTCGAAACACGGGTCATCATAGAA             |
| Gapdh_F                     | TTCCTACCCCCAATGTGTCCGTGG             |
| Gapdh_R                     | GTGGGAGTTGCTGTTGAAGTCGCA             |
| Eef1a1_F                    | CTCTGACTACCCTCCACTTGGTCG             |
| Eef1a1_R                    | ATTAAGACTGGGGTGGCAGGTGTT             |
| Myog_F                      | AAAGCCATCACTTCTGTAGCAGGG             |
| Myog_R                      | TCTCTGGACTCCATCTTTCTCTCC             |
| Acta1_F                     | TCCTCAGGACGACAATCGACAATC             |
| Acta1_R                     | TTCCTTTCCACAGGGCTTTGTTTG             |
| Mettl3_F                    | CTCTGGGCACTTGGATTTAAGGAA             |
| Mettl3_R                    | AGCAACTTCTTCTCTAACTCAGGG             |
| Elavl1_F                    | AGAACATGACCCAAGAGGAACTAC             |
| Elavl1_R                    | GACACCTTAATGGTTTTGGACTGG             |
| Srf_F                       | ATGAGTATTAGCTGACCCGATGGG             |
| Srf_R                       | GGCAGACACAAAGCTAACCAGAGG             |
| Pax7_F                      | TCTCGGGCCAGACAAAATTGCTGC             |
| Pax7_R                      | ATGGGGTGGCTTAGAAACAGTGCC             |
| Myod1_ex1_Fw                | AGCAAAGTGAATGAGGCCTTCGAG             |
| Myod1_int1_Rv               | ATCTAGGTATAAGGGACACCCCA              |
| Myod1_ex2_Rv                | TCACTGTAGTAGGCGGTGTCGTAG             |
| Myod1_int2_Fw               | ATTACTAACCTTCCACTCCCCTCA             |
| Myod1_ex2_Fw                | GCTACGACACCGCCTACTACAGTG             |
| Myod1_ex3_Rv                | CCTGTTCTGTGTCGCTTAGGGATG             |
| Myod1_exon1_CDS_F           | CCGCCTGAGCAAAGTGAATGAGGC             |
| Myod1_exon1_CDS_R           | CCTTCGATGTAGCGGATGGCGTTG             |
| List of primers for cloning |                                      |
| Myod1_full length_F         | CGGAATCCCCTACTACACTCCTATTGGCTTGAGGC  |
| Myod1_full length_R         | CGCAATTGCCCTTCTTCATTACCCAGCACTACCCAG |
| Myod1_5'UTR_deletion_F      | CGGAATTCATGGAGCTTCTATCGCCGCCAC       |
| Myod1_5'UTR_deletion_R      | CGGAATTCGCCACTTTGTATAAATTAGCGTC      |
| Myod1_Mut1_F                | TGACAGGCCAGGCCAGGGAGGAGGGGTAGA       |
| Myod1_Mut1_R                | TCCCTGGCCTGGCCTGTCAGAGGTGTGGTG       |
| Myod1_Mut2_F                | GTAGAGGCCAGCCGGTGTGCATTCCAACCC       |
| Myod1_Mut2_R                | CGGCTGGCCTCTACCCCTCCTCCCTGTCCT       |
| Myod1_6bp-del_F             | CACACCTCTGACAGGCAGGGAGGAGGGGTA       |
| Myod1_6bp-del_R             | TACCCCTCCTCCCTGCCTGTCAGAGGTGTG       |
| Myod1_3'UTR_deletion_F      | CGGAATCCCCTACTACACTCCTATTGGCTTGAGGC  |
| Myod1_3'UTR_deletion_R      | CGGAATTCTCAAAGCACCTGATAAATCGCATTGGGG |
| Myod1_CDS_F                 | CGTCTAGAATGGAGCTTCTATCGCCGCCACTCC    |
| Myod1_CDS_R                 | CGGAATTCTCAAAGCACCTGATAAATCGCATTG    |

**Table S1.** List of primers used for RT-PCR and cloning.
